# Supplementary material for: Framework for evaluating explainable AI in antimicrobial drug discovery
Source: Research Square preprint supplement (doi:10.21203/rs.3.rs-8615784/v1), 2026-01-29
Supplement: Supplementary file 1 [file 0d16fe9679cb9b1bc1220afb.docx]

**A Framework for Evaluating Explainable AI in Antimicrobial Drug Discovery**

Abdulmujeeb T. Onawole1, Mark A.T. Blaskovich1,2 and Johannes Zuegg1*

1Centre for Superbug Solutions, Institute for Molecular Bioscience, The University of Queensland, Brisbane, Queensland, Australia.

2ARC Centre for Agricultural and Environmental Solutions to Antimicrobial Resistance, Institute for Molecular Bioscience, The University of Queensland, Brisbane, Queensland, Australia.

*Correspondence to j.zuegg@uq.edu.au

**Supplementary Material**


**Table S1. Performance comparison of 24 machine learning classifiers using LazyPredict for *S. aureus* antimicrobial activity classification.**

| **Model** | **Accuracy** | **Balanced Accuracy** | **AUCROC** | **F1 Score** | **MCC** |
| --- | --- | --- | --- | --- | --- |
| RandomForestClassifier | 0.820 | 0.783 | 0.883 | 0.869 | 0.585 |
| ExtraTreesClassifier | 0.817 | 0.788 | 0.865 | 0.865 | 0.583 |
| BaggingClassifier | 0.799 | 0.769 | 0.864 | 0.850 | 0.543 |
| KNeighborsClassifier | 0.786 | 0.743 | 0.833 | 0.845 | 0.504 |
| ExtraTreeClassifier | 0.777 | 0.752 | 0.762 | 0.832 | 0.501 |
| DecisionTreeClassifier | 0.776 | 0.753 | 0.762 | 0.830 | 0.500 |
| NuSVC | 0.782 | 0.721 | 0.834 | 0.847 | 0.484 |
| SVC | 0.748 | 0.660 | 0.804 | 0.830 | 0.390 |
| LGBMClassifier | 0.746 | 0.657 | 0.807 | 0.830 | 0.384 |
| GaussianNB | 0.480 | 0.585 | 0.637 | 0.410 | 0.196 |
| NearestCentroid | 0.564 | 0.601 | 0.601 | 0.600 | 0.193 |
| BernoulliNB | 0.629 | 0.597 | 0.640 | 0.714 | 0.188 |
| LogisticRegression | 0.679 | 0.561 | 0.689 | 0.792 | 0.174 |
| AdaBoostClassifier | 0.677 | 0.563 | 0.688 | 0.789 | 0.172 |
| CalibratedClassifierCV | 0.680 | 0.560 | 0.688 | 0.793 | 0.172 |
| LinearDiscriminantAnalysis | 0.679 | 0.558 | 0.688 | 0.793 | 0.169 |
| LinearSVC | 0.681 | 0.554 | 0.688 | 0.796 | 0.167 |
| RidgeClassifierCV | 0.682 | 0.552 | 0.688 | 0.798 | 0.167 |
| RidgeClassifier | 0.682 | 0.552 | 0.688 | 0.798 | 0.167 |
| SGDClassifier | 0.663 | 0.542 | 0.639 | 0.781 | 0.120 |
| Perceptron | 0.586 | 0.551 | 0.583 | 0.679 | 0.099 |
| QuadraticDiscriminantAnalysis | 0.368 | 0.521 | 0.641 | 0.120 | 0.089 |
| PassiveAggressiveClassifier | 0.586 | 0.517 | 0.530 | 0.700 | 0.036 |
| DummyClassifier | 0.668 | 0.500 | 0.500 | 0.801 | 0.000 |

**Table S2. Hyperparameter optimization results for Convolutional Neural Network (CNN)**

| **N** | **Layers** | **Filters** | **Kernel size** | **Dropout** | **Learning rate** | **Best epoch** | **Loss** | **AUCROC** |
| --- | --- | --- | --- | --- | --- | --- | --- | --- |
| 0 | 2 | 32 | 3 | 0.1082 | 0.0041 | 5 | 0.412 | 0.748 |
| 1 | 1 | 128 | 5 | 0.2169 | 0.0001 | 100 | 0.419 | 0.690 |
| 2 | 2 | 256 | 7 | 0.4863 | 0.0015 | 89 | 0.359 | 0.807 |
| 3 | 3 | 128 | 3 | 0.2247 | 0.0003 | 100 | 0.373 | 0.779 |
| 4 | 3 | 64 | 3 | 0.1181 | 0.0001 | 100 | 0.402 | 0.726 |
| 5 | 3 | 128 | 7 | 0.4089 | 0.0000 | 100 | 0.380 | 0.771 |
| 6 | 2 | 64 | 5 | 0.2324 | 0.0000 | 100 | 0.418 | 0.691 |
| 7 | 3 | 64 | 5 | 0.4084 | 0.0002 | 100 | 0.376 | 0.774 |
| 8 | 1 | 128 | 5 | 0.2642 | 0.0011 | 100 | 0.399 | 0.734 |
| 9 | 3 | 64 | 3 | 0.4570 | 0.0003 | 100 | 0.397 | 0.736 |
| 10 | 2 | 256 | 7 | 0.3402 | 0.0045 | 95 | 0.360 | 0.805 |
| 11 | 2 | 256 | 7 | 0.3494 | 0.0049 | 100 | 0.359 | 0.800 |
| 12 | 2 | 256 | 7 | 0.4974 | 0.0015 | 95 | 0.356 | 0.811 |
| 13 | 2 | 256 | 7 | 0.4867 | 0.0011 | 81 | 0.358 | 0.811 |
| 14 | 2 | 256 | 7 | 0.4334 | 0.0010 | 55 | 0.358 | 0.809 |
| 15 | 2 | 256 | 7 | 0.4961 | 0.0006 | 100 | 0.358 | 0.808 |
| 16 | 1 | 32 | 7 | 0.3654 | 0.0019 | 100 | 0.395 | 0.740 |
| 17 | 2 | 256 | 7 | 0.4643 | 0.0005 | 100 | 0.359 | 0.807 |
| 18 | 2 | 256 | 7 | 0.3012 | 0.0023 | 74 | 0.363 | 0.812 |
| 19 | 2 | 256 | 7 | 0.1588 | 0.0026 | 74 | 0.381 | 0.807 |
| 20 | 1 | 32 | 7 | 0.2836 | 0.0006 | 100 | 0.408 | 0.717 |
| 21 | 2 | 256 | 7 | 0.3886 | 0.0025 | 83 | 0.365 | 0.806 |
| 22 | 2 | 256 | 7 | 0.3098 | 0.0012 | 92 | 0.375 | 0.809 |
| 23 | 2 | 256 | 7 | 0.4404 | 0.0008 | 100 | 0.360 | 0.812 |
| 24 | 2 | 256 | 7 | 0.4387 | 0.0007 | 100 | 0.361 | 0.806 |
| 25 | 2 | 256 | 7 | 0.1711 | 0.0004 | 85 | 0.373 | 0.808 |
| 26 | 2 | 256 | 7 | 0.3218 | 0.0001 | 100 | 0.365 | 0.794 |
| 27 | 2 | 256 | 7 | 0.4018 | 0.0024 | 89 | 0.359 | 0.810 |
| 28 | 1 | 32 | 5 | 0.4651 | 0.0004 | 100 | 0.416 | 0.698 |
| 29 | 2 | 32 | 3 | 0.3760 | 0.0031 | 74 | 0.402 | 0.728 |
| 30 | 2 | 256 | 3 | 0.4335 | 0.0009 | 87 | 0.388 | 0.751 |
| 31 | 2 | 256 | 7 | 0.4871 | 0.0017 | 100 | 0.359 | 0.810 |
| 32 | 2 | 256 | 7 | 0.4695 | 0.0015 | 100 | 0.359 | 0.810 |
| 33 | 2 | 256 | 7 | 0.4931 | 0.0033 | 100 | 0.355 | 0.807 |
| 34 | 2 | 128 | 7 | 0.4349 | 0.0009 | 100 | 0.360 | 0.801 |
| 35 | 2 | 256 | 7 | 0.4604 | 0.0019 | 100 | 0.361 | 0.810 |
| 36 | 3 | 256 | 7 | 0.2697 | 0.0014 | 100 | 0.384 | 0.820 |
| 37 | 3 | 128 | 5 | 0.2563 | 0.0001 | 100 | 0.377 | 0.774 |
| 38 | 3 | 64 | 3 | 0.2160 | 0.0008 | 100 | 0.381 | 0.771 |
| 39 | 3 | 256 | 7 | 0.1908 | 0.0035 | 87 | 0.392 | 0.812 |
| 40 | 3 | 64 | 5 | 0.1730 | 0.0033 | 100 | 0.360 | 0.802 |
| 41 | 3 | 256 | 7 | 0.2055 | 0.0012 | 100 | 0.409 | 0.820 |
| 42 | 3 | 256 | 7 | 0.2023 | 0.0013 | 63 | 0.415 | 0.815 |
| **43** | **3** | **256** | **7** | **0.1992** | **0.0002** | **72** | **0.402** | **0.828** |
| 44 | 3 | 256 | 7 | 0.1212 | 0.0002 | 70 | 0.434 | 0.826 |
| 45 | 3 | 128 | 7 | 0.1041 | 0.0002 | 89 | 0.393 | 0.823 |
| 46 | 3 | 128 | 3 | 0.1049 | 0.0002 | 100 | 0.377 | 0.780 |
| 47 | 3 | 128 | 7 | 0.1176 | 0.0001 | 76 | 0.362 | 0.785 |
| 48 | 3 | 128 | 7 | 0.1358 | 0.0001 | 100 | 0.386 | 0.815 |
| 49 | 3 | 128 | 7 | 0.1254 | 0.0000 | 100 | 0.368 | 0.788 |

**Table S3**. **Hyperparameter optimization for Relational Graph Convolutional Network (RGCN)**

| **N** | **Learning rate** | **Weight decay** | **RGCN hidden  features** | **FFN hidden features** | **FFN dropout** | **RGCN dropout** | **Best epoch** | **Loss** | **AUCROC** |
| --- | --- | --- | --- | --- | --- | --- | --- | --- | --- |
| 0 | 0.00073 | 0.00001 | 128-256 | 64 | 0.4 | 0.5 | 33 | 0.601 | 0.692 |
| 1 | 0.00234 | 0.00002 | 64-128-256 | 64 | 0.3 | 0.2 | 57 | 0.530 | 0.786 |
| 2 | 0.00012 | 0.00001 | 64-64-128 | 64 | 0.3 | 0.3 | 99 | 0.599 | 0.698 |
| 3 | 0.00052 | 0.00000 | 256-256 | 64 | 0.2 | 0.1 | 63 | 0.525 | 0.820 |
| 4 | 0.00011 | 0.00000 | 64-128 | 32 | 0.1 | 0.2 | 91 | 0.553 | 0.752 |
| 5 | 0.00610 | 0.00004 | 128-128-256 | 64 | 0.5 | 0.3 | 23 | 0.610 | 0.656 |
| 6 | 0.00053 | 0.00082 | 128-256 | 64 | 0.2 | 0.2 | 32 | 0.566 | 0.747 |
| 7 | 0.00030 | 0.00015 | 64-128 | 32 | 0.3 | 0.2 | 99 | 0.581 | 0.744 |
| 8 | 0.00747 | 0.00000 | 64-128-256 | 32 | 0.3 | 0.4 | 70 | 0.595 | 0.699 |
| 9 | 0.00595 | 0.00022 | 256-256 | 32 | 0.5 | 0.5 | 17 | 0.625 | 0.642 |
| 10 | 0.00191 | 0.00000 | 256-256 | 64 | 0.2 | 0.1 | 53 | 0.502 | 0.816 |
| 11 | 0.00159 | 0.00000 | 256-256 | 64 | 0.2 | 0.1 | 56 | 0.522 | 0.801 |
| 12 | 0.00164 | 0.00000 | 256-256 | 64 | 0.2 | 0.1 | 53 | 0.463 | 0.843 |
| 13 | 0.00035 | 0.00000 | 256-256 | 64 | 0.2 | 0.1 | 63 | 0.486 | 0.831 |
| 14 | 0.00030 | 0.00001 | 256-256 | 64 | 0.2 | 0.1 | 83 | 0.501 | 0.825 |
| 15 | 0.00026 | 0.00001 | 128-128-256 | 64 | 0.4 | 0.1 | 64 | 0.632 | 0.728 |
| 16 | 0.00024 | 0.00003 | 64-64-128 | 64 | 0.1 | 0.4 | 99 | 0.573 | 0.738 |
| 17 | 0.00041 | 0.00001 | 256-256 | 64 | 0.2 | 0.1 | 60 | 0.492 | 0.826 |
| 18 | 0.00019 | 0.00002 | 256-256 | 32 | 0.2 | 0.1 | 29 | 0.530 | 0.775 |
| 19 | 0.00092 | 0.00006 | 256-256 | 64 | 0.2 | 0.1 | 62 | 0.517 | 0.809 |
| 20 | 0.00016 | 0.00000 | 64-128 | 64 | 0.4 | 0.3 | 77 | 0.631 | 0.658 |
| 21 | 0.00039 | 0.00001 | 256-256 | 64 | 0.2 | 0.1 | 72 | 0.472 | 0.834 |
| 22 | 0.00041 | 0.00001 | 256-256 | 64 | 0.2 | 0.1 | 36 | 0.499 | 0.820 |
| 23 | 0.00072 | 0.00001 | 256-256 | 64 | 0.2 | 0.1 | 40 | 0.503 | 0.800 |
| 24 | 0.00035 | 0.00001 | 256-256 | 64 | 0.2 | 0.4 | 58 | 0.564 | 0.764 |
| 25 | 0.00020 | 0.00000 | 64-64-128 | 64 | 0.5 | 0.5 | 54 | 0.621 | 0.642 |
| 26 | 0.00054 | 0.00006 | 128-128-256 | 32 | 0.1 | 0.1 | 38 | 0.506 | 0.823 |
| 27 | 0.00112 | 0.00001 | 64-128-256 | 64 | 0.2 | 0.1 | 44 | 0.497 | 0.819 |
| 28 | 0.00023 | 0.00000 | 128-256 | 64 | 0.2 | 0.1 | 49 | 0.534 | 0.782 |
| 29 | 0.00312 | 0.00001 | 128-256 | 64 | 0.4 | 0.5 | 48 | 0.563 | 0.734 |
| 30 | 0.00084 | 0.00002 | 256-256 | 64 | 0.2 | 0.1 | 60 | 0.478 | 0.832 |
| 31 | 0.00041 | 0.00001 | 256-256 | 64 | 0.2 | 0.1 | 66 | 0.546 | 0.801 |
| 32 | 0.00062 | 0.00001 | 256-256 | 64 | 0.2 | 0.1 | 51 | 0.506 | 0.808 |
| 33 | 0.00015 | 0.00001 | 256-256 | 64 | 0.2 | 0.1 | 94 | 0.475 | 0.840 |
| 34 | 0.00036 | 0.00000 | 256-256 | 64 | 0.2 | 0.3 | 63 | 0.516 | 0.791 |
| 35 | 0.00030 | 0.00001 | 64-128-256 | 64 | 0.3 | 0.1 | 61 | 0.589 | 0.752 |
| 36 | 0.00118 | 0.00000 | 64-64-128 | 64 | 0.1 | 0.2 | 57 | 0.515 | 0.801 |
| 37 | 0.00044 | 0.00003 | 256-256 | 64 | 0.5 | 0.1 | 61 | 0.600 | 0.735 |
| 38 | 0.00011 | 0.00000 | 64-128 | 32 | 0.2 | 0.3 | 99 | 0.581 | 0.720 |
| 39 | 0.00065 | 0.00000 | 128-128-256 | 64 | 0.4 | 0.4 | 99 | 0.582 | 0.741 |
| 40 | 0.00015 | 0.00000 | 128-256 | 64 | 0.3 | 0.2 | 68 | 0.554 | 0.754 |
| 41 | 0.00048 | 0.00001 | 256-256 | 64 | 0.2 | 0.1 | 49 | 0.504 | 0.815 |
| 42 | 0.00033 | 0.00001 | 256-256 | 64 | 0.2 | 0.1 | 56 | 0.511 | 0.812 |
| 43 | 0.00041 | 0.00000 | 256-256 | 64 | 0.2 | 0.1 | 51 | 0.519 | 0.798 |
| 44 | 0.00026 | 0.00001 | 256-256 | 32 | 0.2 | 0.5 | 92 | 0.553 | 0.752 |
| **45** | **0.00057** | **0.00038** | **256-256** | **64** | **0.2** | **0.1** | **49** | **0.446** | **0.852** |
| 46 | 0.00021 | 0.00002 | 256-256 | 64 | 0.2 | 0.1 | 93 | 0.513 | 0.813 |
| 47 | 0.00020 | 0.00009 | 64-128-256 | 64 | 0.5 | 0.1 | 89 | 0.606 | 0.738 |
| 48 | 0.00013 | 0.00002 | 64-128 | 64 | 0.1 | 0.2 | 99 | 0.550 | 0.765 |
| 49 | 0.00029 | 0.00002 | 256-256 | 32 | 0.3 | 0.1 | 49 | 0.597 | 0.738 |

**Table S4**. Test set evaluation of Random Forest models from 5×5 cross-validation (selected 5 models are in bold).

| **CV ID** | **AUCROC** | **Precision** | **MCC** |
| --- | --- | --- | --- |
| CV1 R1 | 0.866 | 0.924 | 0.558 |
| CV1 R2 | 0.863 | 0.922 | 0.517 |
| CV1 R3 | 0.863 | 0.920 | 0.544 |
| **CV1 R4** | **0.868** | **0.924** | **0.553** |
| CV1 R5 | 0.867 | 0.921 | 0.559 |
| CV2 R1 | 0.868 | 0.922 | 0.553 |
| **CV2 R2** | **0.870** | **0.924** | **0.545** |
| CV2 R3 | 0.867 | 0.921 | 0.548 |
| CV2 R4 | 0.869 | 0.924 | 0.553 |
| CV2 R5 | 0.869 | 0.925 | 0.572 |
| CV3 R1 | 0.865 | 0.924 | 0.558 |
| **CV3 R2** | **0.869** | **0.924** | **0.549** |
| CV3 R3 | 0.862 | 0.918 | 0.559 |
| CV3 R4 | 0.865 | 0.923 | 0.536 |
| CV3 R5 | 0.865 | 0.920 | 0.553 |
| CV4 R1 | 0.865 | 0.920 | 0.529 |
| **CV4 R2** | **0.868** | **0.923** | **0.554** |
| CV4 R3 | 0.868 | 0.923 | 0.548 |
| CV4 R4 | 0.868 | 0.924 | 0.549 |
| CV4 R5 | 0.868 | 0.923 | 0.536 |
| CV5 R1 | 0.865 | 0.925 | 0.519 |
| CV5 R2 | 0.861 | 0.921 | 0.550 |
| CV5 R3 | 0.862 | 0.922 | 0.534 |
| CV5 R4 | 0.865 | 0.923 | 0.521 |
| **CV5 R5** | **0.866** | **0.924** | **0.534** |

**Table S5**. Test set evaluation of CNN models from 5×5 cross-validation (selected 5 models are in bold)

| **CV ID** | **AUCROC** | **Precision** | **MCC** |
| --- | --- | --- | --- |
| CV1 R1 | 0.860 | 0.918 | 0.543 |
| CV1 R2 | 0.862 | 0.921 | 0.550 |
| CV1 R3 | 0.861 | 0.919 | 0.515 |
| CV1 R4 | 0.861 | 0.919 | 0.550 |
| **CV1 R5** | **0.869** | **0.924** | **0.552** |
| CV2 R1 | 0.864 | 0.920 | 0.526 |
| CV2 R2 | 0.862 | 0.919 | 0.547 |
| CV2 R3 | 0.864 | 0.922 | 0.540 |
| CV2 R4 | 0.863 | 0.920 | 0.533 |
| **CV2 R5** | **0.867** | **0.923** | **0.538** |
| **CV3 R1** | **0.867** | **0.923** | **0.547** |
| CV3 R2 | 0.864 | 0.920 | 0.543 |
| CV3 R3 | 0.854 | 0.916 | 0.505 |
| CV3 R4 | 0.790 | 0.880 | 0.376 |
| CV3 R5 | 0.864 | 0.919 | 0.539 |
| CV4 R1 | 0.860 | 0.918 | 0.540 |
| CV4 R2 | 0.862 | 0.920 | 0.537 |
| **CV4 R3** | **0.864** | **0.920** | **0.551** |
| CV4 R4 | 0.863 | 0.918 | 0.539 |
| CV4 R5 | 0.857 | 0.915 | 0.539 |
| CV5 R1 | 0.864 | 0.921 | 0.535 |
| CV5 R2 | 0.860 | 0.921 | 0.523 |
| CV5 R3 | 0.862 | 0.919 | 0.543 |
| **CV5 R4** | **0.865** | **0.923** | **0.530** |
| CV5 R5 | 0.862 | 0.918 | 0.563 |

**Table S6**: Test set evaluation of RGCN models from 5×5 cross-validation (selected 5 models are in bold)

| **CV ID** | **AUCROC** | **Precision** | **MCC** |
| --- | --- | --- | --- |
| **CV1 R1** | **0.966** | **0.983** | **0.766** |
| CV1 R2 | 0.908 | 0.953 | 0.607 |
| CV1 R3 | 0.876 | 0.934 | 0.554 |
| CV1 R4 | 0.829 | 0.908 | 0.474 |
| CV1 R5 | 0.939 | 0.969 | 0.690 |
| CV2 R1 | 0.831 | 0.909 | 0.464 |
| CV2 R2 | 0.768 | 0.870 | 0.371 |
| CV2 R3 | 0.839 | 0.916 | 0.480 |
| **CV2 R4** | **0.926** | **0.962** | **0.664** |
| CV2 R5 | 0.849 | 0.921 | 0.492 |
| CV3 R1 | 0.975 | 0.988 | 0.807 |
| **CV3 R2** | **0.982** | **0.991** | **0.831** |
| CV3 R3 | 0.792 | 0.886 | 0.409 |
| CV3 R4 | 0.899 | 0.947 | 0.607 |
| CV3 R5 | 0.974 | 0.987 | 0.794 |
| CV4 R1 | 0.931 | 0.964 | 0.674 |
| CV4 R2 | 0.947 | 0.973 | 0.711 |
| **CV4 R3** | **0.984** | **0.992** | **0.845** |
| CV4 R4 | 0.930 | 0.963 | 0.676 |
| CV4 R5 | 0.823 | 0.903 | 0.462 |
| CV5 R1 | 0.813 | 0.898 | 0.433 |
| **CV5 R2** | **0.980** | **0.990** | **0.819** |
| CV5 R3 | 0.847 | 0.918 | 0.485 |
| CV5 R4 | 0.964 | 0.982 | 0.762 |
| CV5 R5 | 0.946 | 0.973 | 0.705 |

**Table S9: Context sensitivity by antibiotic class. Directionality and Discrimination use scaffold both.**

| **Model** | **Class** | **#Pairs** | **Scaffold Both** | **Directionality**† | **Discrimination**† |
| --- | --- | --- | --- | --- | --- |
| RF | Beta-lactam | 100 | 78 | 75.6% | 0.0%* |
| RF | Fluoroquinolones | 98 | 70 | 81.4% | 0.0%* |
| RF | Oxazolidinone | 100 | 89 | 94.4% | 0.0%* |
| CNN | Beta-lactam | 100 | 88 | 68.2% | 50.0% |
| CNN | Fluoroquinolones | 98 | 15 | 73.3% | 100.0% |
| CNN | Oxazolidinone | 100 | 85 | 76.5% | 82.0% |
| RGCN | Beta-lactam | 100 | 100 | 72.0% | 57.0% |
| RGCN | Fluoroquinolones | 98 | 77 | 70.1% | 92.9% |
| RGCN | Oxazolidinone | 100 | 67 | 46.3% | 88.0% |

*RF discrimination is 0% due to TreeSHAP producing positive attributions for present features.

† Scaffold recognition in both compounds is required before context sensitivity can be assessed


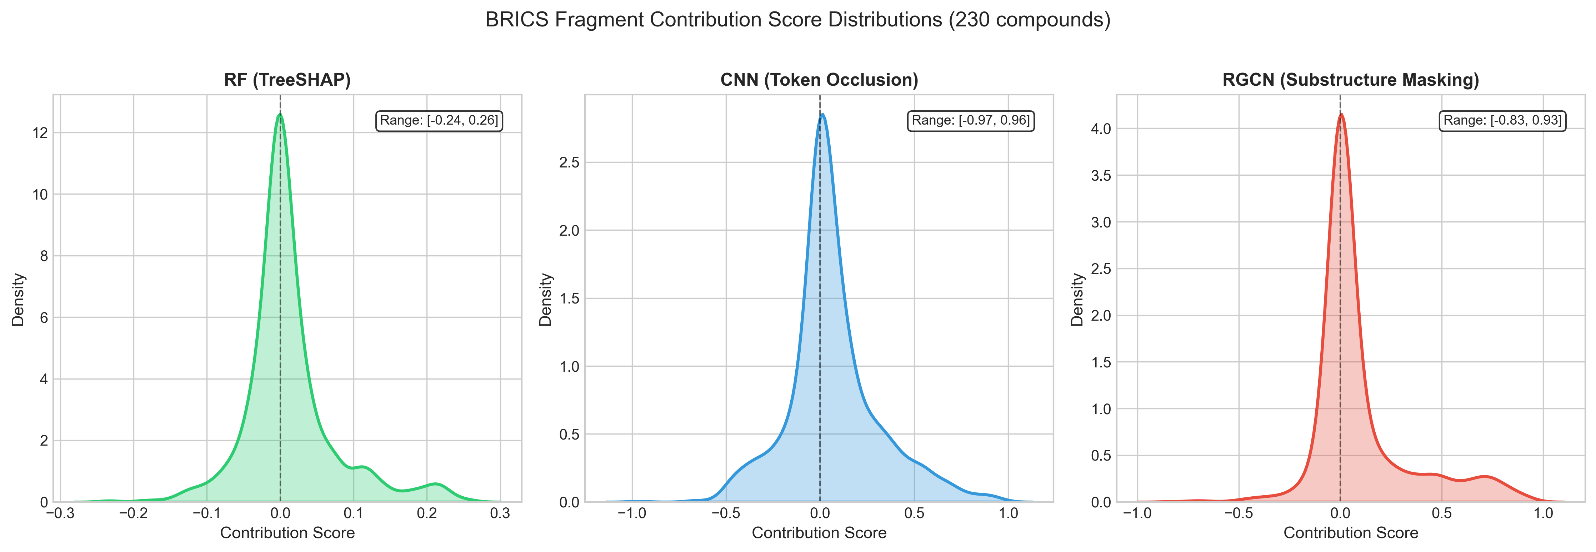


**Fig. S1**: Distrubtion of the BRICS fragment contribution scores for 230 unique compounds from the activity cliff, for the different models.

.lfwsdegirhliysutrfELQ

das'dks;fjdks;ljfg;ludw
